# Supplementary material for: Cd1d regulates B cell development but not B cell accumulation and IL10 production in mice with pathologic CD5+ B cell expansion
Source: PubMed Central journal article supplement (PMC4632344; doi:10.1186/s12865-015-0130-z), 2015-11-04
Supplement: 12865_2015_130_MOESM2_ESM.pdf [file 12865_2015_130_MOESM2_ESM.pdf]

Table S1. Bone marrow and spleen populations in 12 wk WT, dnRAG1, Eμ-TCL1, and DTG mice on *Cd1d*<sup>+/+</sup> or *Cd1d*<sup>del/del</sup> backgrounds

| Source and Subset                                          | WT<br><i>Cd1d</i> <sup>+/+</sup><br>(n=4) | dnRAG1<br><i>Cd1d</i> <sup>+/+</sup><br>(n=4) | Eμ-TCL1<br><i>Cd1d</i> <sup>+/+</sup><br>(n=4) | DTG<br><i>Cd1d</i> <sup>+/+</sup><br>(n=4) | WT<br><i>Cd1d</i> <sup>del/del</sup><br>(n=4) | dnRAG1<br><i>Cd1d</i> <sup>del/del</sup><br>(n=4) | Eμ-TCL1<br><i>Cd1d</i> <sup>del/del</sup><br>(n=4) | DTG<br><i>Cd1d</i> <sup>del/del</sup><br>(n=4) |
|------------------------------------------------------------|-------------------------------------------|-----------------------------------------------|------------------------------------------------|--------------------------------------------|-----------------------------------------------|---------------------------------------------------|----------------------------------------------------|------------------------------------------------|
| <b>Bone Marrow</b>                                         |                                           |                                               |                                                |                                            |                                               |                                                   |                                                    |                                                |
| Total Cellularity (x10 <sup>5</sup> )                      | 325±61                                    | 372±53                                        | 388±39                                         | 433±59                                     | 366±38                                        | 318±17                                            | 352±63                                             | 357±26                                         |
| Total Lymphocytes (x10 <sup>5</sup> )                      | 131±20                                    | 143±18                                        | 156±17                                         | 190±25                                     | 141±17                                        | 122±10                                            | 141±25                                             | 152±11                                         |
| B220 <sup>+</sup> CD43 <sup>+</sup> IgM <sup>-a</sup>      | 2.7±0.2                                   | 2.8±0.3                                       | 3.3±0.8                                        | 3.0±0.6                                    | 2.4±0.6                                       | 1.9±0.4                                           | 2.2±0.5                                            | 2.2±0.5                                        |
| B220 <sup>+</sup> CD43 <sup>-a</sup>                       | 42±3                                      | 44±5                                          | 56±3                                           | 54±4                                       | 48±8                                          | 31±3                                              | 57±13                                              | 42±3                                           |
| Pre-B (IgM <sup>-</sup> IgD <sup>-</sup> ) <sup>b</sup>    | 23±2                                      | 24±3                                          | 30±0.5                                         | 34±1                                       | 26±4                                          | 19±2                                              | 29±7                                               | 28±3                                           |
| Immature (IgM <sup>+</sup> IgD <sup>-</sup> ) <sup>b</sup> | 7.2±0.8                                   | 6.9±1.6                                       | 8.4±0.4                                        | 7.7±0.1                                    | 8.4±1.3                                       | 5.2±0.6                                           | 9.3±2.4                                            | 6.3±1.1                                        |
| Mature (IgM <sup>+</sup> IgD <sup>+</sup> ) <sup>b</sup>   | 11±1                                      | 7.2±0.7                                       | 16±2                                           | 8.4±0.8                                    | 12±3                                          | 5.3±0.4                                           | 17±4                                               | 5.6±0.4                                        |
| <b>Spleen</b>                                              |                                           |                                               |                                                |                                            |                                               |                                                   |                                                    |                                                |
| Total Cellularity (x10 <sup>5</sup> )                      | 470±52                                    | 524±48                                        | 465±91                                         | 950±138                                    | 479±52                                        | 514±84                                            | 360±70                                             | 865±136                                        |
| Total Lymphocytes (x10 <sup>5</sup> )                      | 306±33                                    | 341±35                                        | 320±71                                         | 644±98                                     | 317±32                                        | 334±54                                            | 237±47                                             | 623±107                                        |
| CD19 <sup>+c</sup>                                         | 116±15                                    | 143±7                                         | 117±17                                         | 413±65                                     | 102±16                                        | 150±19                                            | 84±18                                              | 417±72                                         |
| B220 <sup>hi</sup> AA4.1 <sup>+</sup> CD5 <sup>-d</sup>    | 21±2                                      | 16±1                                          | 22±3                                           | 14±2                                       | 16±2                                          | 9.5±1.9*                                          | 12±3*                                              | 6.9±0.8*                                       |
| T1 (IgM <sup>hi</sup> CD23 <sup>-</sup> ) <sup>e</sup>     | 9.8±1.1                                   | 9.9±1.0                                       | 12±2                                           | 9.7±1.3                                    | 8.0±0.9                                       | 6.0±1.3                                           | 6.8±1.9*                                           | 4.6±0.6*                                       |
| T2 (IgM <sup>hi</sup> CD23 <sup>+</sup> ) <sup>e</sup>     | 5.6±0.3                                   | 1.8±0.1                                       | 5.0±0.8                                        | 0.84±0.15                                  | 4.1±0.7*                                      | 1.0±0.2                                           | 2.5±0.8*                                           | 0.38±0.07                                      |
| T3 (IgM <sup>dim</sup> CD23 <sup>+</sup> ) <sup>e</sup>    | 2.6±0.3                                   | 0.89±0.08                                     | 2.3±0.3                                        | 0.46±0.05                                  | 1.9±0.2*                                      | 0.47±0.06                                         | 0.89±0.21*                                         | 0.21±0.03                                      |
| B220 <sup>hi</sup> AA4.1 <sup>-</sup> CD5 <sup>-d</sup>    | 79±12                                     | 47±3                                          | 79±13                                          | 31±3                                       | 71±11                                         | 36±5                                              | 59±12                                              | 27±3                                           |
| MZ (CD21 <sup>hi</sup> CD23 <sup>-</sup> ) <sup>f</sup>    | 3.1±0.7                                   | 7.1±0.7                                       | 4.7±1.4                                        | 1.6±0.4                                    | 3.9±0.7                                       | 5.1±1.1                                           | 3.2±0.9                                            | 1.1±0.3                                        |
| FM (CD21 <sup>int</sup> CD23 <sup>int</sup> ) <sup>f</sup> | 68±10                                     | 29±2                                          | 65±10                                          | 18±1                                       | 60±10                                         | 21±3                                              | 45±9                                               | 15±2                                           |
| CD5 <sup>+d</sup>                                          | 8.2±0.5                                   | 71±5                                          | 8.9±1.1                                        | 349±63                                     | 7.5±1.5                                       | 98±13                                             | 8.3±1.5                                            | 371±73                                         |
| B220 <sup>-</sup> CD3 <sup>+c</sup>                        | 111±8                                     | 120±14                                        | 110±26                                         | 119±18                                     | 120±9                                         | 102±21                                            | 86±23                                              | 111±13                                         |
| CD4 <sup>+g</sup>                                          | 63±5                                      | 74±10                                         | 62±15                                          | 72±10                                      | 67±6                                          | 62±13                                             | 48±13                                              | 69±9                                           |
| CD8 <sup>+g</sup>                                          | 39±3                                      | 36±5                                          | 39±10                                          | 36±8                                       | 44±3                                          | 32±7                                              | 30±9                                               | 30±4                                           |
| Total CD1d-tet <sup>+g</sup>                               | 1.5±0.1                                   | 2.7±0.5                                       | 1.2±0.2                                        | 2.0±0.4                                    | 0.02*                                         | 0.02*                                             | <0.01*                                             | 0.02*                                          |
| NK1.1 <sup>+</sup> CD1d-tet <sup>+h</sup>                  | 0.90±0.11                                 | 1.4±0.3                                       | 0.74±0.10                                      | 1.2±0.2                                    | <0.01*                                        | <0.01*                                            | <0.01*                                             | <0.01*                                         |
| NK1.1 <sup>-</sup> CD1d-tet <sup>+h</sup>                  | 0.62±0.11                                 | 1.2±0.2                                       | 0.46±0.12                                      | 0.84±0.14                                  | <0.02*                                        | <0.02*                                            | <0.01*                                             | <0.02*                                         |

<sup>a</sup> Total cells (x 10<sup>5</sup>) calculated from Ly6C<sup>-</sup>DX5<sup>-</sup>CD4<sup>-</sup> cells within a lymphocyte gate.

<sup>b</sup> Total cells (x 10<sup>5</sup>) calculated from gated B220<sup>+</sup>CD43<sup>-</sup> cells.

<sup>c</sup> Total cells (x 10<sup>5</sup>) calculated from gated lymphocytes.

<sup>d</sup> Total cells (x 10<sup>5</sup>) calculated from gated CD19<sup>+</sup> cells.

<sup>e</sup> Total cells (x 10<sup>5</sup>) calculated from gated B220<sup>hi</sup>AA4.1<sup>+</sup>CD5<sup>-</sup> cells.

<sup>f</sup> Total cells (x 10<sup>5</sup>) calculated from gated B220<sup>hi</sup>AA4.1<sup>-</sup>CD5<sup>-</sup> cells

<sup>g</sup> Total cells (x 10<sup>5</sup>) calculated from gated B220<sup>-</sup>CD3<sup>+</sup> lymphocytes.

<sup>h</sup> Total cells (x 10<sup>5</sup>) calculated from gated CD1d-tet<sup>+</sup> lymphocytes.

\* *p* < 0.05 compared to similar *Cd1d*<sup>+/+</sup> counterpart (e.g. dnRAG1 *Cd1d*<sup>del/del</sup> vs dnRAG1 *Cd1d*<sup>+/+</sup>).
