# Supplementary material for: Cd1d regulates B cell development but not B cell accumulation and IL10 production in mice with pathologic CD5+ B cell expansion
Source: PubMed Central journal article supplement (PMC4632344; doi:10.1186/s12865-015-0130-z), 2015-11-04
Supplement: 12865_2015_130_MOESM3_ESM.pdf [file 12865_2015_130_MOESM3_ESM.pdf]

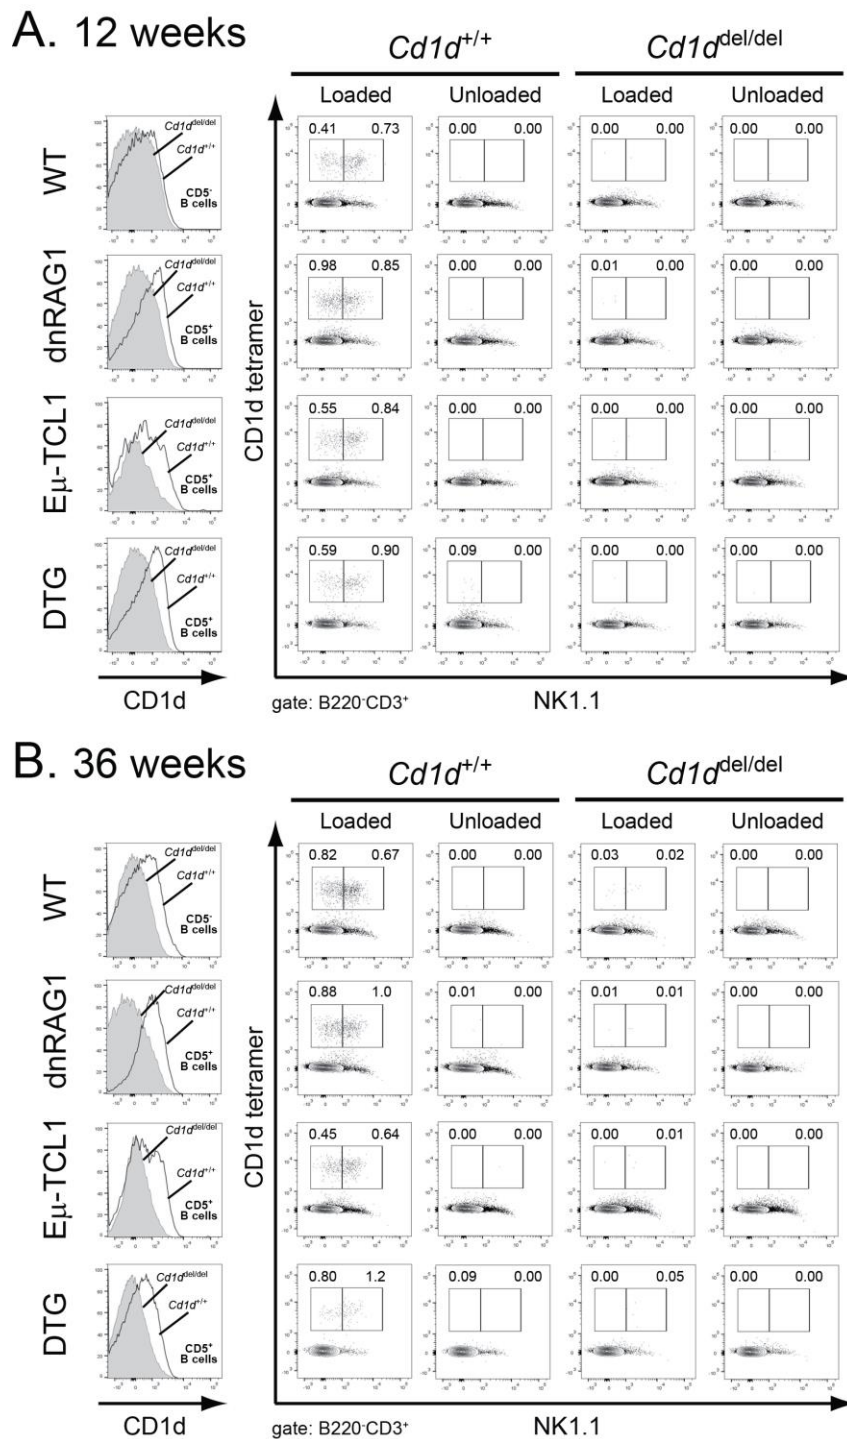

**Figure S1. *Cd1d*<sup>del/del</sup> mice show loss of CD1d expression on B cells and an absence of CD1d-restricted NKT cells.**

(A-B) WT, dnRAG1, Eμ-TCL1, and DTG mice on a *Cd1d*<sup>+/+</sup> or *Cd1d*<sup>del/del</sup> background were compared at 12 weeks (A) or 36 weeks (B) for the expression of CD1d expression on gated splenic CD19<sup>+</sup> B cells that were either CD5<sup>-</sup> (WT mice) or CD5<sup>+</sup> (dnRAG1, Eμ-TCL1, and DTG mice) by flow cytometry (overlays, left panel), and for the presence of splenic CD1d-restricted NKT cells using flow cytometry by staining cells with CD1d tetramer (unloaded or loaded with PBS-57). Gated B220<sup>+</sup>CD3<sup>+</sup> cells were analyzed for NK1.1 expression on CD1d tetramer<sup>+</sup> cells (right panels). The percentage of NK1.1<sup>-</sup> and NK1.1<sup>+</sup> cells in this population is shown for each genotype and is representative of n=4-6 animal/genotype. The mean absolute number of cells in each population is summarized in Table S1.
