# Supplementary material for: Cd1d regulates B cell development but not B cell accumulation and IL10 production in mice with pathologic CD5+ B cell expansion
Source: PubMed Central journal article supplement (PMC4632344; doi:10.1186/s12865-015-0130-z), 2015-11-04
Supplement: 12865_2015_130_MOESM4_ESM.pdf [file 12865_2015_130_MOESM4_ESM.pdf]

Table S2. Bone marrow and spleen populations in 36 wk WT, dnRAG1, Eμ-TCL1, and DTG mice on *Cd1d*<sup>+/+</sup> or *Cd1d*<sup>del/del</sup> backgrounds

| Source and Subset                                          | WT<br><i>Cd1d</i> <sup>+/+</sup><br>(n=5) | dnRAG1<br><i>Cd1d</i> <sup>+/+</sup><br>(n=5) | Eμ-TCL1<br><i>Cd1d</i> <sup>+/+</sup><br>(n=5) | DTG<br><i>Cd1d</i> <sup>+/+</sup><br>(n=5) | WT<br><i>Cd1d</i> <sup>del/del</sup><br>(n=5) | dnRAG1<br><i>Cd1d</i> <sup>del/del</sup><br>(n=6) | Eμ-TCL1<br><i>Cd1d</i> <sup>del/del</sup><br>(n=4) | DTG<br><i>Cd1d</i> <sup>del/del</sup><br>(n=5) |
|------------------------------------------------------------|-------------------------------------------|-----------------------------------------------|------------------------------------------------|--------------------------------------------|-----------------------------------------------|---------------------------------------------------|----------------------------------------------------|------------------------------------------------|
| <b>Bone Marrow</b>                                         |                                           |                                               |                                                |                                            |                                               |                                                   |                                                    |                                                |
| Total Cellularity (x10 <sup>5</sup> )                      | 414±25                                    | 494±43                                        | 445±43                                         | 424±37                                     | 408±29                                        | 496±36                                            | 308±93*                                            | 477±44                                         |
| Total Lymphocytes (x10 <sup>5</sup> )                      | 181±20                                    | 233±27                                        | 221±22                                         | 223±25                                     | 174±14                                        | 226±18                                            | 149±45                                             | 214±19                                         |
| B220 <sup>+</sup> CD43 <sup>+</sup> IgM <sup>-a</sup>      | 3.4±0.4                                   | 3.5±0.4                                       | 4.0±0.4                                        | 2.8±0.3                                    | 3.3±0.4                                       | 3.8±0.4                                           | 2.7±0.9                                            | 2.8±0.7                                        |
| B220 <sup>+</sup> CD43 <sup>-a</sup>                       | 39±7                                      | 52±12                                         | 57±9                                           | 49±10                                      | 36±5                                          | 52±6                                              | 24±8*                                              | 23±4*                                          |
| Pre-B (IgM <sup>-</sup> IgD <sup>-</sup> ) <sup>b</sup>    | 19±5                                      | 31±9                                          | 34±6                                           | 24±6                                       | 16±4                                          | 28±5                                              | 14±5*                                              | 12±3                                           |
| Immature (IgM <sup>+</sup> IgD <sup>-</sup> ) <sup>b</sup> | 5.5±1.5                                   | 8.7±2.4                                       | 9.7±2.4                                        | 11±5                                       | 4.0±0.9                                       | 8.1±1.4                                           | 3.3±1.2                                            | 3.5±0.9*                                       |
| Mature (IgM <sup>+</sup> IgD <sup>+</sup> ) <sup>b</sup>   | 14±1                                      | 12±1                                          | 12±2                                           | 12±3                                       | 15±1                                          | 14±1                                              | 5.3±2.3*                                           | 6.4±2.2*                                       |
| <b>Spleen</b>                                              |                                           |                                               |                                                |                                            |                                               |                                                   |                                                    |                                                |
| Total Cellularity (x10 <sup>5</sup> )                      | 597±60                                    | 481±80                                        | 647±82                                         | 7173±3620                                  | 507±39                                        | 661±48                                            | 2324±1242                                          | 8971±3216                                      |
| Total Lymphocytes (x10 <sup>5</sup> )                      | 356±42                                    | 299±57                                        | 392±39                                         | 5298±3053                                  | 271±33                                        | 424±30                                            | 1318±730                                           | 6153±2427                                      |
| CD19 <sup>+c</sup>                                         | 127±15                                    | 140±24                                        | 155±22                                         | 4567±2963                                  | 93±20                                         | 214±25                                            | 800±575                                            | 4457±2004                                      |
| B220 <sup>hi</sup> AA4.1 <sup>+</sup> CD5 <sup>-d</sup>    | 14±2                                      | 9.6±2.0                                       | 14±1                                           | 20±7                                       | 7.0±0.1                                       | 8.5±0.6                                           | 11±4                                               | 17±8                                           |
| T1 (IgM <sup>hi</sup> CD23 <sup>-</sup> ) <sup>e</sup>     | 5.7±1.1                                   | 5.4±1.1                                       | 7.9±0.6                                        | 14±5                                       | 2.4±0.2                                       | 4.7±0.4                                           | 5.8±2.3                                            | 10±5                                           |
| T2 (IgM <sup>hi</sup> CD23 <sup>+</sup> ) <sup>e</sup>     | 5.6±0.9                                   | 2.3±0.6                                       | 2.8±0.4                                        | 0.91±0.21                                  | 2.8±0.1*                                      | 1.9±0.2                                           | 1.3±0.5                                            | 1.4±0.9                                        |
| T3 (IgM <sup>dim</sup> CD23 <sup>+</sup> ) <sup>e</sup>    | 1.6±0.2                                   | 0.9±0.2                                       | 1.1±0.2                                        | 0.31±0.07                                  | 1.2±0.2                                       | 0.79±0.07                                         | 0.55±0.13                                          | 0.53±0.44                                      |
| B220 <sup>hi</sup> AA4.1 <sup>-</sup> CD5 <sup>-d</sup>    | 107±13                                    | 100±17                                        | 117±19                                         | 1485±878                                   | 83±20                                         | 148±17                                            | 540±367                                            | 1177±419                                       |
| MZ (CD21 <sup>hi</sup> CD23 <sup>-</sup> ) <sup>f</sup>    | 6.2±0.6                                   | 5.1±1.2                                       | 2.5±1.5                                        | 6.8±5.9                                    | 5.1±0.8                                       | 9.8±2.2                                           | 1.1±0.4                                            | 1.2±0.7                                        |
| FM (CD21 <sup>int</sup> CD23 <sup>int</sup> ) <sup>f</sup> | 91±10                                     | 75±10                                         | 91±16                                          | 576±389                                    | 68±17                                         | 104±13                                            | 308±209                                            | 273±152                                        |
| CD5 <sup>+d</sup>                                          | 10±1                                      | 75±16                                         | 86±19                                          | 4439±2953                                  | 7.1±1.0                                       | 133±23                                            | 730±558                                            | 4256±1978                                      |
| B220 <sup>-</sup> CD3 <sup>+c</sup>                        | 135±18                                    | 90±22                                         | 126±19                                         | 156±28                                     | 105±14                                        | 120±9                                             | 182±41                                             | 430±125*                                       |
| CD4 <sup>+g</sup>                                          | 74±10                                     | 50±12                                         | 63±8                                           | 77±11                                      | 57±7                                          | 63±5                                              | 84±20                                              | 119±20*                                        |
| CD8 <sup>+g</sup>                                          | 48±7                                      | 31±8                                          | 49±9                                           | 51±12                                      | 37±7                                          | 46±4                                              | 66±10                                              | 239±115*                                       |
| Total CD1d-tet <sup>+g</sup>                               | 2.6±0.5                                   | 2.0±0.4                                       | 2.1±0.5                                        | 4.6±1.2                                    | 0.060±0.017*                                  | 0.051±0.019*                                      | 0.035±0.014*                                       | 0.11±0.04*                                     |
| NK1.1 <sup>+</sup> CD1d-tet <sup>+h</sup>                  | 1.5±0.8                                   | 1.0±0.2                                       | 0.96±0.24                                      | 2.7±0.7                                    | 0.020±0.005*                                  | 0.018±0.004*                                      | 0.014±0.006*                                       | 0.035±0.016*                                   |
| NK1.1 <sup>-</sup> CD1d-tet <sup>+h</sup>                  | 1.1±0.2                                   | 0.95±0.21                                     | 1.1±0.2                                        | 2.0±0.7                                    | 0.040±0.013*                                  | 0.033±0.015*                                      | 0.021±0.010*                                       | 0.076±0.029*                                   |

<sup>a</sup> Total cells (x 10<sup>5</sup>) calculated from Ly6C<sup>-</sup>DX5<sup>-</sup>CD4<sup>-</sup> cells within a lymphocyte gate.

<sup>b</sup> Total cells (x 10<sup>5</sup>) calculated from gated B220<sup>+</sup>CD43<sup>-</sup> cells.

<sup>c</sup> Total cells (x 10<sup>5</sup>) calculated from gated lymphocytes.

<sup>d</sup> Total cells (x 10<sup>5</sup>) calculated from gated CD19<sup>+</sup> cells.

<sup>e</sup> Total cells (x 10<sup>5</sup>) calculated from gated B220<sup>hi</sup>AA4.1<sup>+</sup>CD5<sup>-</sup> cells.

<sup>f</sup> Total cells (x 10<sup>5</sup>) calculated from gated B220<sup>hi</sup>AA4.1<sup>-</sup>CD5<sup>-</sup> cells

<sup>g</sup> Total cells (x 10<sup>5</sup>) calculated from gated B220<sup>-</sup>CD3<sup>+</sup> lymphocytes.

<sup>h</sup> Total cells (x 10<sup>5</sup>) calculated from gated CD1d-tet<sup>+</sup> lymphocytes.

\* *p* < 0.05 compared to similar *Cd1d*<sup>+/+</sup> counterpart (e.g. dnRAG1 *Cd1d*<sup>del/del</sup> vs dnRAG1 *Cd1d*<sup>+/+</sup>).
